# Supplementary material for: The Role of Incentives in Deciding to Receive the Available COVID-19 Vaccine in Israel
Source: MDPI journal article supplement (doi:10.3390/vaccines10010077), 2022-01-04
Supplement: s1 [file s1]

**Table S1. Items for assessing measures of HBM and incentives.**

| Model             | Measures                 | Items                                                                                                                                                 |
|-------------------|--------------------------|-------------------------------------------------------------------------------------------------------------------------------------------------------|
| <b>HBM</b>        | Perceived susceptibility | I believe that if I do not get vaccinated, the likelihood of me getting infected with corona will increase                                            |
|                   |                          | I believe that if I do not get vaccinated, the likelihood of my family and relatives getting infected in Corona will increase                         |
|                   | *Perceived severity      | Even if I will get infected with COVID-19 I do not think it will cause me significant suffering or complications                                      |
|                   |                          | Even if I get infected with COVID-19, the likelihood of recovering from the disease is very high                                                      |
|                   | Perceived Benefits       | I believe that COVID-19 vaccine will have high efficacy in preventing significant suffering and complications of the disease                          |
|                   |                          | I believe that if I get vaccinated against COVID-19 the risk of getting infected with the disease or infecting others will decrease                   |
|                   | Perceived barriers       | Getting vaccinated is expensive, requires time and effort                                                                                             |
|                   | Cues to action           | The chances of me getting vaccinated against COVID-19 will increase if opinion leaders on social media express support for the benefit of the vaccine |
|                   |                          | The chances of me getting vaccinated against COVID-19 will increase if friends and family express support for the benefit of the vaccine              |
|                   |                          | The chances of me getting vaccinated against COVID-19 will increase if official guidelines from the Ministry of Health are published                  |
|                   |                          | The chances of me getting vaccinated against COVID-19 will increase if my GP recommends me                                                            |
|                   |                          | If my workplace takes care of vaccinating the workers against COVID-19, I will vaccinate                                                              |
|                   | Health motivation        | I exercise as recommended for my age                                                                                                                  |
|                   |                          | I make sure to eat a healthy and varied diet                                                                                                          |
| <b>Incentives</b> | Availability             | If the vaccine is accessible and available                                                                                                            |
|                   | Monetary reward          | If I receive a monetary reward for getting vaccinated                                                                                                 |
|                   | Green pass               | If I receive a "green pass" that will allow various reliefs (entry to places of entertainment etc.)                                                   |
|                   | Monetary penalty         | If the government cuts my social security benefits or imposes another fine if I do not get vaccinated                                                 |

a Cronbach indicates the internal consistency: **HBM**  $\alpha=0.796$

Items Response scale: 1-6 agreement

\* Negative items were reverse scored.

**Table S2:** Univariate analyses between HBM, incentives variables and willingness to get vaccinated against COVID-19

|                          | DO not-intend to get vaccinated<br>(n= 86) |        | Intend to get vaccinated<br>(n= 375) |        | t-test | P value (two-tail) |
|--------------------------|--------------------------------------------|--------|--------------------------------------|--------|--------|--------------------|
| Variables                | Mean (SD)                                  |        | Mean (SD)                            |        |        |                    |
| HBM variables            |                                            |        |                                      |        |        |                    |
| Perceived Susceptibility | 2.84                                       | (1.39) | 5.04                                 | (1.21) | -14.67 | <.001              |
| Perceived Severity       | 2.68                                       | (1.42) | 2.98                                 | (1.24) | -1.96  | .051               |
| Perceived Benefits       | 3.40                                       | (1.32) | 5.38                                 | (.75)  | -13.39 | <.001              |
| Perceived Barriers       | 3.22                                       | (1.76) | 3.04                                 | (1.67) | .86    | .39                |
| Cues to action           | 2.10                                       | (1.12) | 4.21                                 | (1.15) | -15.41 | <.001              |
| Health motivation        | 4.21                                       | (1.45) | 4.00                                 | (1.39) | 1.23   | .220               |
| Incentives variables     |                                            |        |                                      |        |        |                    |
| Availability             | 2.09                                       | (1.14) | 5.31                                 | (1.21) | -22.50 | <.001              |
| Monetary reward          | 1.69                                       | (1.18) | 3.03                                 | (2.05) | -5.84  | <.001              |
| Green pass               | 2.88                                       | (1.88) | 4.91                                 | (1.59) | -9.30  | <.001              |
| Monetary penalty         | 2.81                                       | (1.90) | 3.95                                 | (1.94) | -4.93  | <.001              |

Note: COVID-19 vaccination intention measured by the item: “I want to get vaccinated against the COVID-19 virus now that a vaccine is available”, on a 1-6 agreement scale

HBM and incentives Items Response scale: 1-6 agreement

**Table S3:** Univariate analyses between HBM, incentives variables and the sense of urgency to receive COVID-19 vaccine

|                             | Immediately<br>(n= 279) |        | Within 3 months (n= 73) |        | Within a year<br>(n= 75) |        | F-test | P<br>value |
|-----------------------------|-------------------------|--------|-------------------------|--------|--------------------------|--------|--------|------------|
| <b>Variables</b>            | Mean                    | (SD)   | Mean                    | (SD)   | Mean                     | (SD)   |        |            |
| <b>HBM variables</b>        |                         |        |                         |        |                          |        |        |            |
| Perceived Susceptibility    | 5.23                    | (1.11) | 4.27                    | (1.35) | 3.86                     | (1.46) | 46.19  | <.001      |
| Perceived Severity          | 3.06                    | (1.28) | 2.80                    | (1.15) | 2.80                     | (1.28) | 2.08   | .127       |
| Perceived Benefits          | 5.49                    | (.72)  | 4.97                    | (.76)  | 4.32                     | (1.18) | 63.58  | <.001      |
| Perceived Barriers          | 2.96                    | (1.68) | 3.32                    | (1.65) | 3.30                     | (1.70) | 2.13   | .12        |
| Cues to action              | 4.41                    | (.99)  | 3.72                    | (1.18) | 2.80                     | (1.32) | 67.20  | <.001      |
| Health motivation           | 3.90                    | (1.41) | 4.23                    | (1.39) | 4.11                     | (1.31) | 1.84   | .161       |
| <b>Incentives variables</b> |                         |        |                         |        |                          |        |        |            |
| Availability                | 5.64                    | (.88)  | 4.61                    | (1.28) | 2.84                     | (1.42) | 209.45 | <.001      |
| Monetary reward             | 3.07                    | (2.11) | 2.76                    | (1.86) | 2.47                     | (1.69) | 2.92   | (.06)      |
| Green pass                  | 5.11                    | (1.52) | 4.48                    | (1.62) | 3.58                     | (1.80) | 28.39  | <.001      |
| Monetary penalty            | 4.13                    | (1.97) | 3.35                    | (1.78) | 3.44                     | (1.78) | 7.15   | .001       |

Note: the sense of urgency to receive COVID-19 vaccine measured by the item: "now as the vaccine is available, how soon will you get vaccinated? Immediately, within 3 months or within a year?".

HBM and incentives Items Response scale: 1-6 agreement
